# Supplementary material
Source: publisher site journal article supplement (https://www.spandidos-publications.com/2823/downloadSupplementary)
Supplement: Supplementary file 1 [file downloadSupplementary]

Figure S1. Transfection efficiency of si-HGF and OE-HGF in HepG2 cells. HGF (A) mRNA and (B) protein expression levels in HepG2 cells transfected with si-HGF or OE-HGF. Data are presented as the mean  $\pm$  SD. \*\* $P < 0.001$  vs. CON; ## $P < 0.001$  vs. co-NC. si, small interfering RNA; OE, overexpression; HGF, hepatocyte growth factor; CON, blank control; co-NC, combination NC (si-NC + pcDNA3.1 empty vector); NC, negative control.

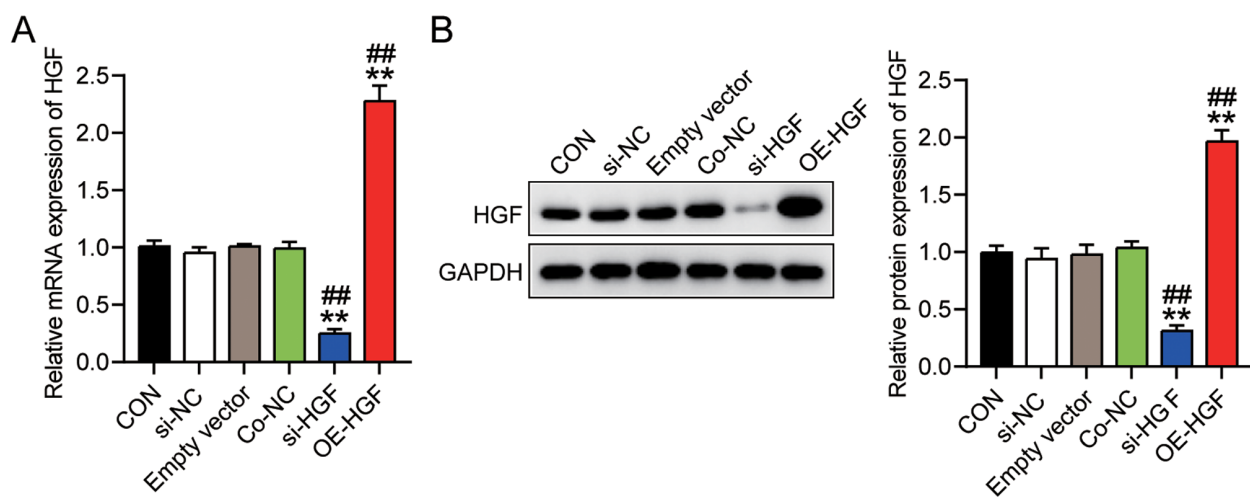

Figure S2. Transfection efficiency of miR-93-5p mimic and miR-93-5p inhibitor in HepG2 cells. miR-93-5p expression levels in HepG2 cells transfected with miR-93-5p mimic or miR-93-5p inhibitor. \*\*P<0.001 vs. CON; ##P<0.001 vs. co-NC. miR, microRNA; CON, blank control; NC, negative control; co-NC, combination NC (mimic-NC + inhibitor-NC).

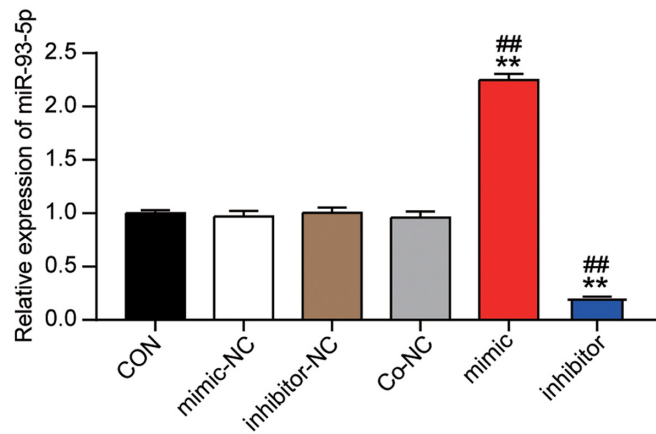

Table SI. Sequences of siRNAs, miR-mimics and miR-inhibitors.

| Transfection vector                                                                                                    | Sequence (5'→3')                                         |
|------------------------------------------------------------------------------------------------------------------------|----------------------------------------------------------|
| si-HGF                                                                                                                 | CAAGTGCAGTAACATATCTCCTGAA                                |
| si-NC                                                                                                                  | ACGTCTCGTGTATCCACCGTAAGCC                                |
| miR-93-5p mimic                                                                                                        | F: CAAAGUGCUGUUCGUGCAGGUAG<br>R: ACCUGCACGAACAGCACUUUGUU |
| mimic-NC                                                                                                               | F: UUCUCCGAACGUGUCACGUTT<br>R: ACGUGACACGUUCGGAGAATT     |
| miR-93-5p inhibitor                                                                                                    | CACUUAUCAGGUUGUAUUAUAA                                   |
| inhibitor-NC                                                                                                           | CAGUACUUUUGUGUAGUACAA                                    |
| si, small interfering RNA; HGF, hepatocyte growth factor; NC, negative control; miR, microRNA; F, forward; R, reverse. |                                                          |
